# Supplementary material
Source: PubMed Central journal article supplement (PMC4641004)
Supplement: NIHMS684756-supplement-01.pdf [file NIHMS684756-supplement-01.pdf]

1  
2  
3  
4  
5  
6  
7  
8  
9  
10  
11

## **Online Repository**

### **Genetic risk factors of decreased bone mineral accretion in children with asthma receiving multiple oral corticosteroid bursts**

Heung-Woo Park, Bing Ge, Szeman Tse, Elin Grundberg,

Tomi Pastinen, H. William Kelly, Kelan G. Tantisira

12

13 **Table E1. Relationship between variables and BMA in white CAMP subjects**

| 14 | Variables                       | Beta                   | P value                |
|----|---------------------------------|------------------------|------------------------|
| 15 | Cumulative dose of prednisone   | $-3.04 \times 10^{-6}$ | $7.96 \times 10^{-5}$  |
| 16 | Covariates measured at baseline |                        |                        |
| 17 | Age                             | $-7.19 \times 10^{-4}$ | 0.149                  |
| 18 | Gender (female vs. male)        | 0.00384                | 0.002                  |
| 19 | BMD                             | 0.148                  | $< 2 \times 10^{-16}$  |
| 20 | Height                          | $-3.45 \times 10^{-5}$ | 0.535                  |
| 21 | BMI                             | $-1.94 \times 10^{-4}$ | 0.357                  |
| 22 | Vitamin D                       | $-1.55 \times 10^{-5}$ | 0.669                  |
| 23 | Tanner stage 2 (vs. 1)          | 0.00136                | 0.379                  |
| 24 | Tanner stage 3 (vs. 1)          | -0.00137               | 0.631                  |
| 25 | Tanner stage 4 (vs. 1)          | -0.0271                | $4.32 \times 10^{-11}$ |
| 26 | Tanner stage 5 (vs. 1)          | -0.0470                | $1.52 \times 10^{-4}$  |

27 \* Multiple linear regression analysis

28

29 **Table E2. Beta coefficients and *P* values of associations between variables and BMA\***

| 30 | Variables                           | Beta                      | <i>P</i> value            |
|----|-------------------------------------|---------------------------|---------------------------|
| 31 | CumOCS                              | -1.074 x 10 <sup>-6</sup> | 0.3428                    |
| 32 | Age                                 | 9.954 x 10 <sup>-4</sup>  | 0.0397                    |
| 33 | Female (vs. male)                   | 3.389 x 10 <sup>-3</sup>  | 0.0004                    |
| 34 | BMD (z score)                       | 0.1497                    | <2 x 10 <sup>-16</sup>    |
| 35 | Height                              | -3.635 x 10 <sup>-5</sup> | 0.5004                    |
| 36 | BMI                                 | -1.224 x 10 <sup>-4</sup> | 0.5492                    |
| 37 | Serum concentration of vitamin D    | 2.392 x 10 <sup>-5</sup>  | 0.4941                    |
| 38 | Tanner stage 2 (vs. Tanner stage 1) | 1.698 x 10 <sup>-3</sup>  | 0.2585                    |
| 39 | Tanner stage 3 (vs. Tanner stage 1) | -9.935 x 10 <sup>-4</sup> | 0.7180                    |
| 40 | Tanner stage 4 (vs. Tanner stage 1) | -2.251 x 10 <sup>-2</sup> | 3.570 x 10 <sup>-10</sup> |
| 41 | Tanner stage 5 (vs. Tanner stage 1) | -4.541 x 10 <sup>-2</sup> | 1.420 x 10 <sup>-4</sup>  |
| 42 | rs2074439HE (vs. rs2074439MA)       | -5.411 x 10 <sup>-4</sup> | 0.7193                    |
| 43 | rs2074439MI (vs. rs2074439MA)       | -1.657 x 10 <sup>-3</sup> | 0.4655                    |
| 44 | rs9896933HE (vs. rs9896933MA)       | -6.734 x 10 <sup>-3</sup> | 0.0803                    |
| 45 | rs9896933MI (vs. rs9896933MA)       | -8.235 x 10 <sup>-3</sup> | 1.880 x 10 <sup>-5</sup>  |
| 46 | CumOCS:rs2074439HE                  | -2.147 x 10 <sup>-6</sup> | 0.01754                   |
| 47 | (vs. CumOCS:rs2074439MA)            |                           |                           |
| 48 | CumOCS:rs2074439MI                  | -8.666 x 10 <sup>-6</sup> | 1.480 x 10 <sup>-4</sup>  |
| 49 | (vs. CumOCS:rs2074439MA)            |                           |                           |
| 50 | CumOCS:rs9896933HE                  | -1.260 x 10 <sup>-5</sup> | 8.077 x 10 <sup>-3</sup>  |

Genetic factors for decreased BMA in asthmatic children receiving OCS

51 (vs. CumOCS:rs9896933MA)

52 CumOCS:rs9896933MI  $-7.525 \times 10^{-6}$   $2.790 \times 10^{-5}$

53 (vs. CumOCS:rs9896933MA)

---

54 \*A regression model: BMA ~ cumulative dose of OCS + age + sex + BMD + height + body mass  
55 index + serum concentration of vitamin D + Tanner stage + rs2074439 genotype (additive model)  
56 + rs9896933 genotype (additive model) + cumulative dose of OCS\*rs2074439 genotype +  
57 cumulative dose of OCS\*rs9896933. CumOCS; cumulative oral corticosteroid, BMA; bone  
58 mineral density, BMI: body mass index, MA; major allele homozygote, HE; heterozygote, MI;  
59 minor allele homozygote

60

61 **Table E3. Beta coefficients and *P* values of associations between cumulative dose of OCS**62 **and BMA stratified by the number of mutant alleles of rs9896933 and rs2074439**

| 63 Group                              | Beta                      | P value*                |
|---------------------------------------|---------------------------|-------------------------|
| 64 Whole population                   | -3.036 x 10 <sup>-6</sup> | 7.96 x 10 <sup>-5</sup> |
| 65 Subjects without mutant allele     | -1.183 x 10 <sup>-6</sup> | 0.3504                  |
| 66 Subjects with one mutant allele    | -2.587 x 10 <sup>-6</sup> | 0.0298                  |
| 67 Subjects with two mutant alleles   | -7.178 x 10 <sup>-6</sup> | 5.38 x 10 <sup>-5</sup> |
| 68 Subjects with three mutant alleles | -2.871 x 10 <sup>-5</sup> | 1.57 x 10 <sup>-5</sup> |

69 \*Adjusted by age, sex, BMD, height, body mass index, serum concentration of vitamin D, and

70 Tanner stage measured at baseline

71

72 **Figure E1. The QQ-plot and Manhattan plot for the interaction results**

73 A. QQ-plot

74 Red line; genome-wide significance

75 B. Manhattan plot

76

77 **Figure E2. Correlations between cumulative dose of OCS and BMA stratified by genotype**

78 **of rs9896933**

79 A. Whole population, reference allele homozygotes, heterozygotes, and mutant allele

80 homozygotes

81 B. Merge of individual regression lines

82 A slope obtained from simple linear regression analysis became steeper as the number of mutant

83 alleles of two SNPs increased. P values were obtained from Pearson's correlation analysis,  $r$ ;

84 correlation coefficient. PD; Prednisone

85

86 **Figure E3. Correlations between B cumulative dose of OCS and MA stratified by genotype**

87 **of rs2074439**

88 A. Whole population, reference allele homozygotes, heterozygotes, and mutant allele

89 homozygotes

90 B. Merge of individual regression lines

91 A slope obtained from simple linear regression analysis became steeper as the number of mutant

92 alleles of two SNPs increased. P values were obtained from Pearson's correlation analysis,  $r$ ;

93 correlation coefficient. PD; Prednisone

94

95 **Figure E4. Correlations between cumulative dose of OCS and BMA stratified by the**

96 **number of mutant alleles of rs9896933 and rs2074439 (Merge of individual regression lines)**

97 A slope obtained from simple linear regression analysis became steeper as the number of mutant

98 alleles of two SNPs increased. P values were obtained from Pearson's correlation analysis, r;

99 correlation coefficient

100

101 **Figure E5. Comparison of BMA stratified by rs9896933 in asthmatic children without OCS**

102 **bursts between those randomized to ICS and those randomized to placebo**

103 Differences according to the treatment groups or to the genotypes of rs9896933 were not

104 statistically significant.

105

Figure E1

A.

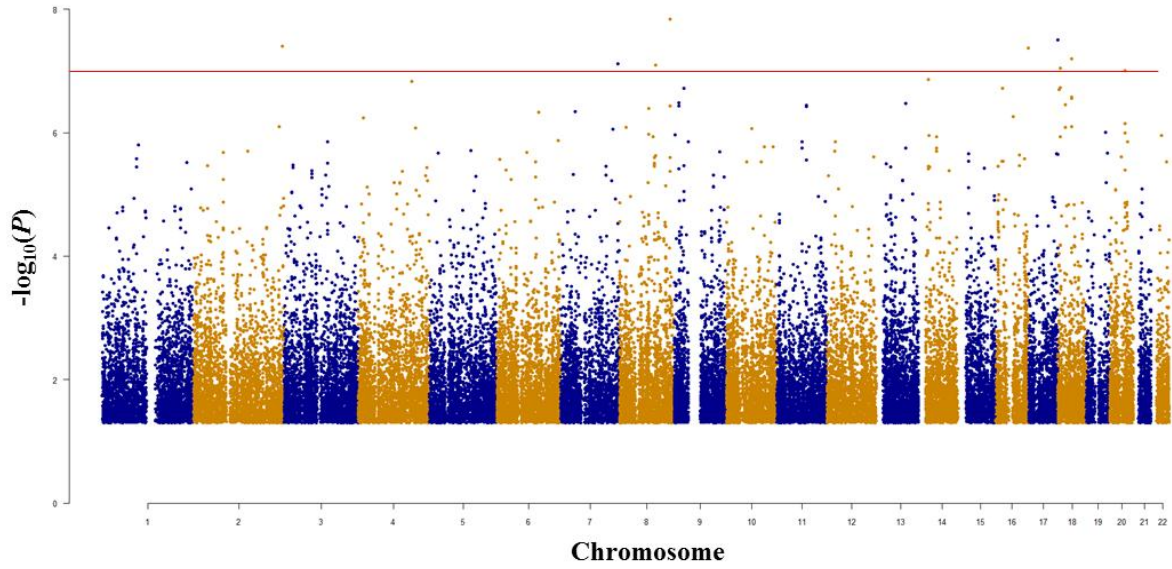

B.

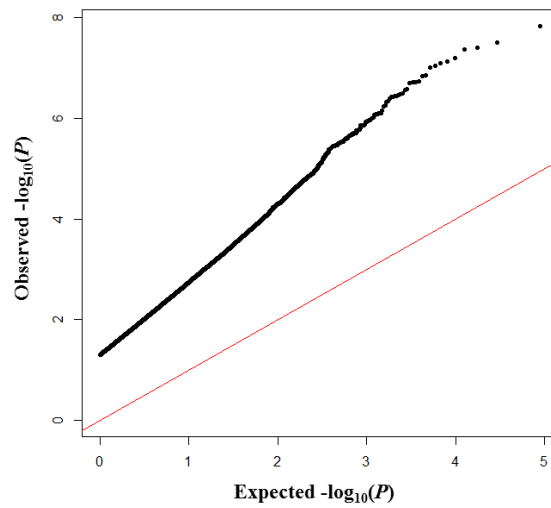



Figure E2.

A.

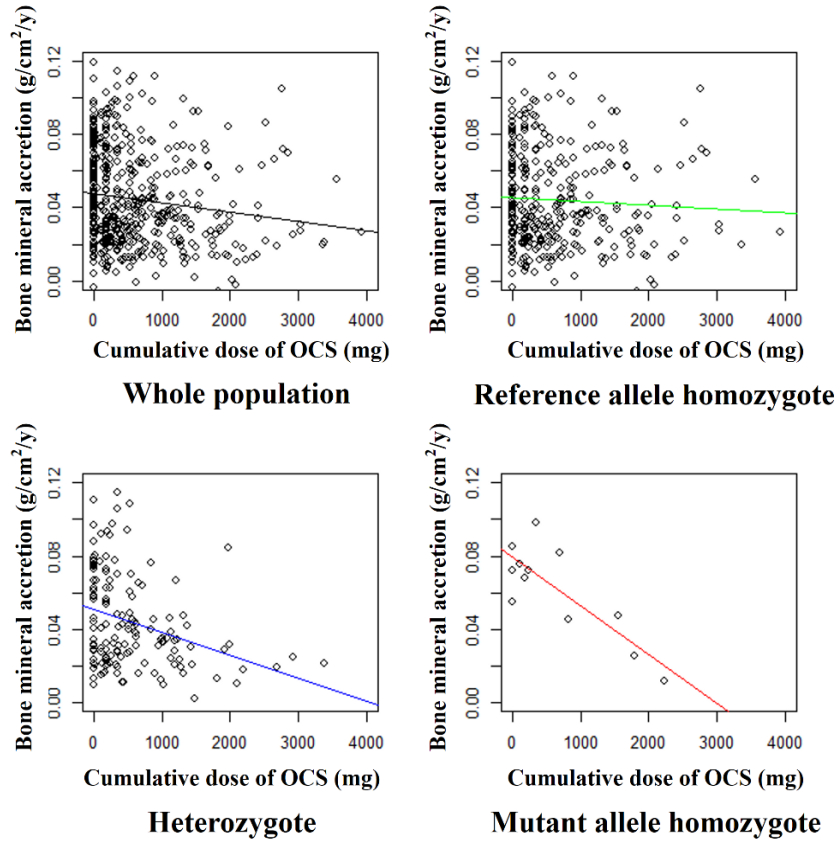

# Genetic factors for decreased BMA in asthmatic children receiving OCS

B.

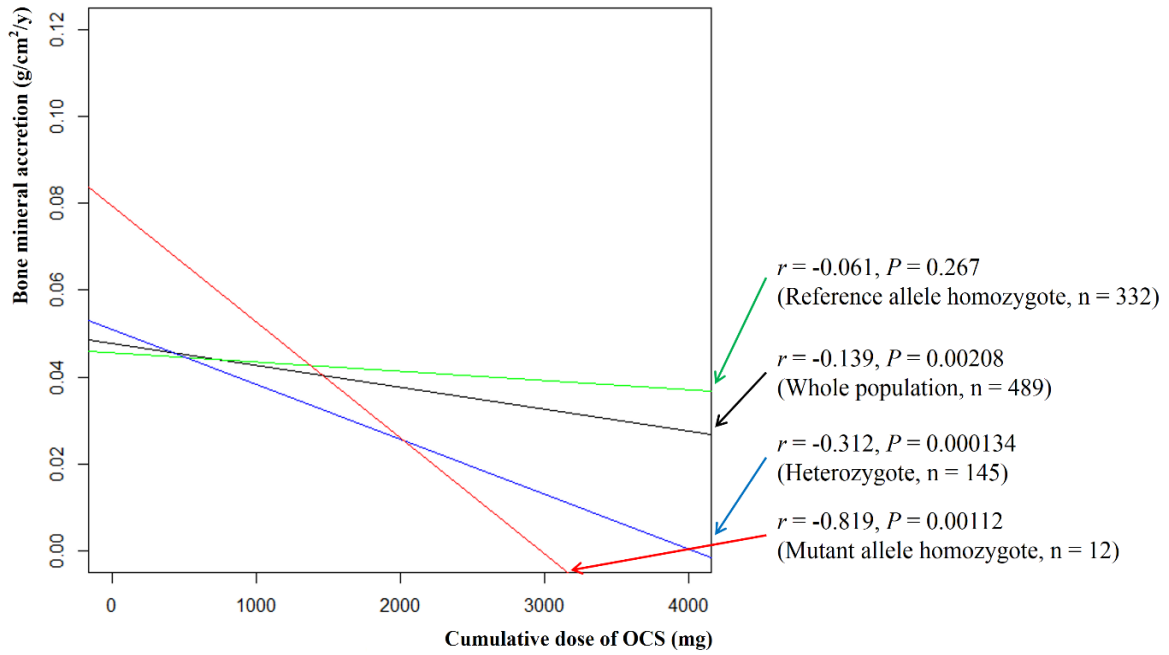

Figure E3.

A.

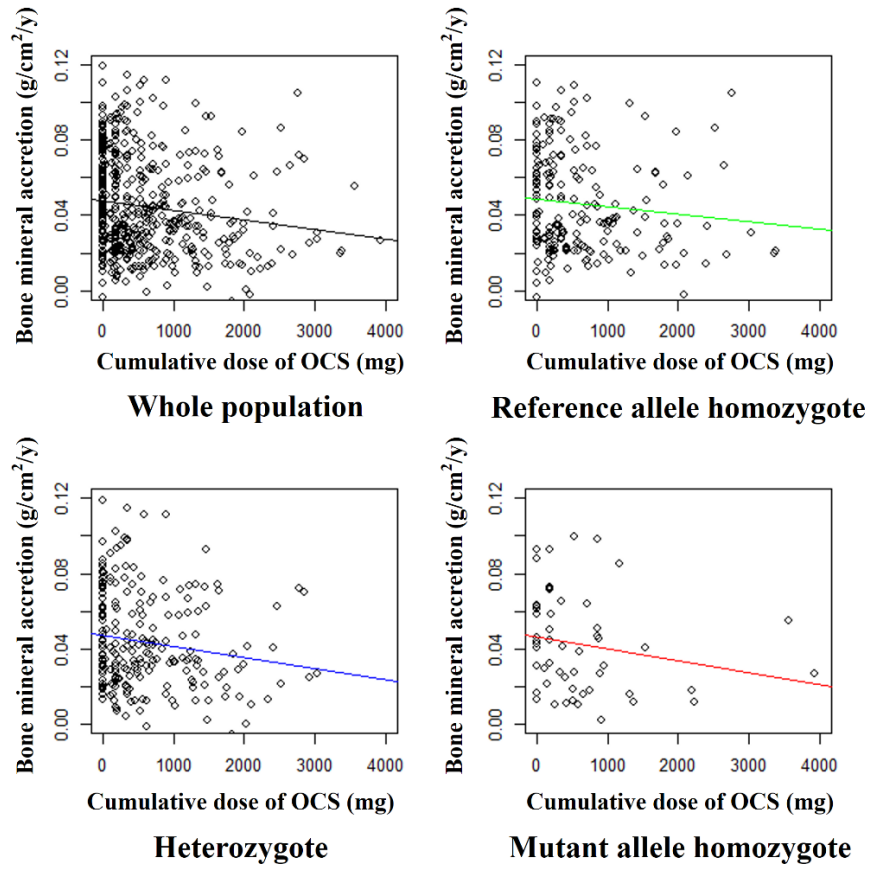

# Genetic factors for decreased BMA in asthmatic children receiving OCS

B.

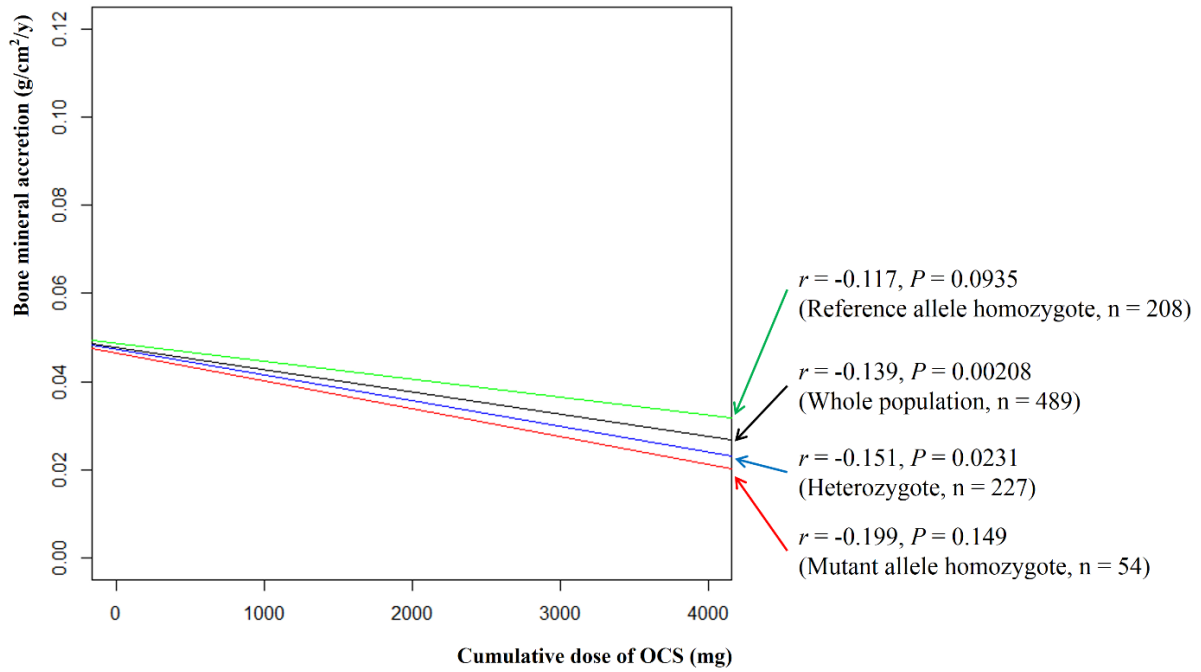

Figure E4.

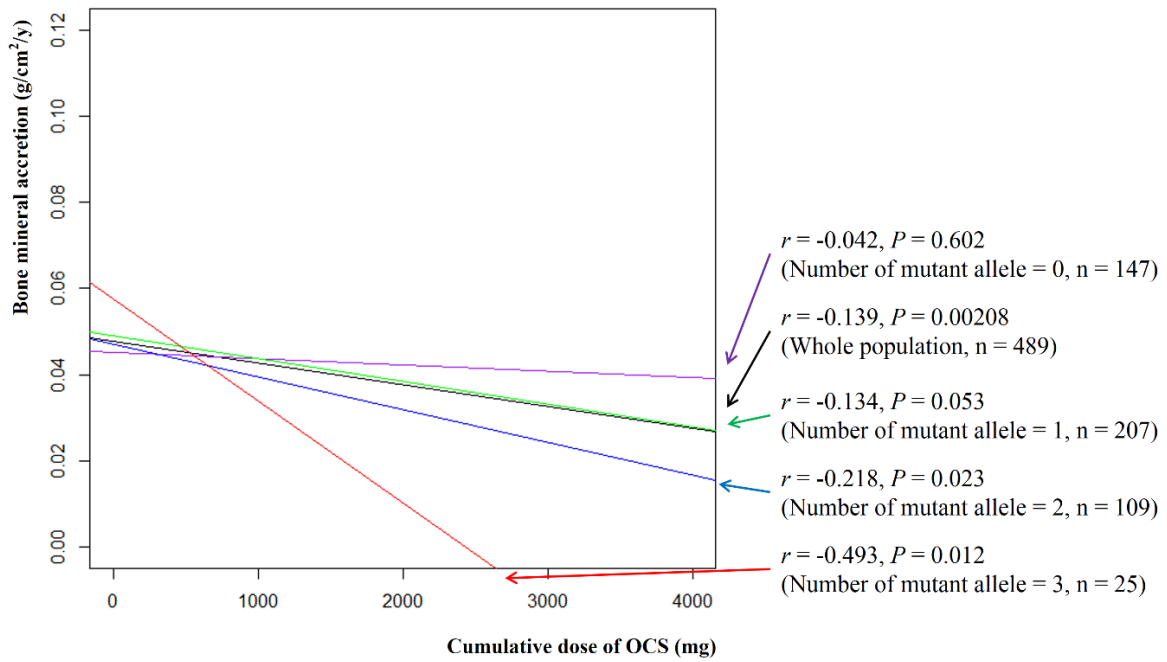

Figure E5.

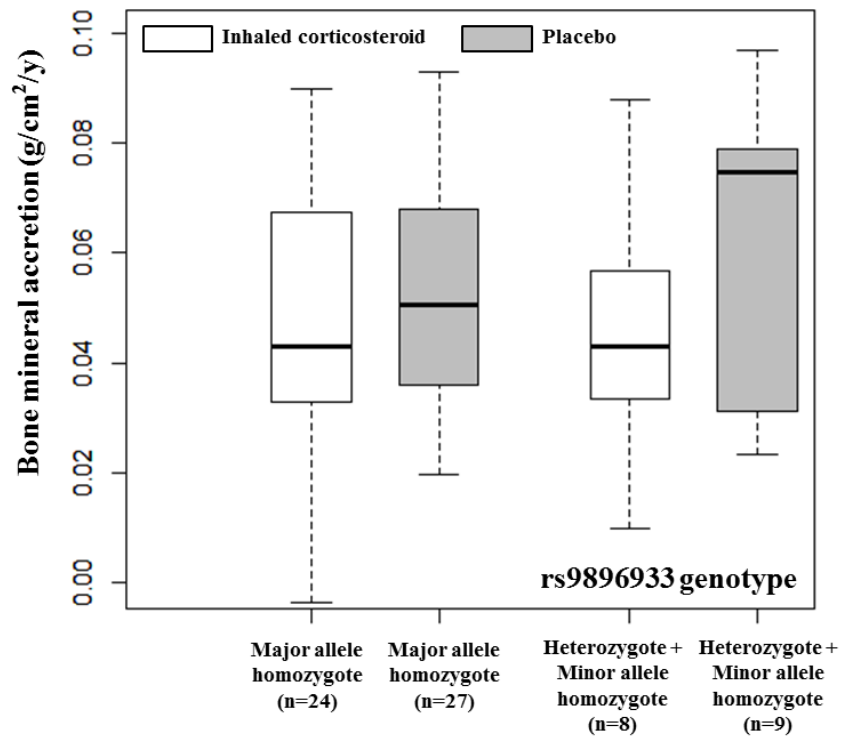

| CHR | SNP           | BP        | A1 | TEST        | NMISS | BETA      | STAT   |
|-----|---------------|-----------|----|-------------|-------|-----------|--------|
|     | 8 rs7003550   | 135920080 |    | 1 ADDxCUMPD | 484   | -8.15E-06 | -5.767 |
|     | 17 rs9896933  | 78491377  |    | 4 ADDxCUMPD | 484   | -8.56E-06 | -5.627 |
|     | 2 rs7599706   | 237470426 |    | 3 ADDxCUMPD | 484   | -1.49E-05 | -5.584 |
|     | 16 rs12447718 | 87097635  |    | 1 ADDxCUMPD | 483   | -1.31E-05 | -5.571 |
|     | 18 rs4368243  | 36637481  |    | 4 ADDxCUMPD | 480   | -5.99E-06 | -5.497 |
|     | 7 rs2316527   | 154253390 |    | 1 ADDxCUMPD | 484   | -1.13E-05 | -5.462 |
|     | 8 rs4484658   | 96277902  |    | 4 ADDxCUMPD | 484   | -8.90E-06 | -5.451 |
|     | 18 rs7506840  | 6512756   |    | 1 ADDxCUMPD | 484   | -1.11E-05 | -5.432 |
|     | 20 rs10485681 | 39926486  |    | 3 ADDxCUMPD | 484   | -8.63E-06 | -5.412 |
|     | 14 rs12432642 | 26304106  |    | 2 ADDxCUMPD | 482   | -1.39E-05 | -5.348 |
|     | 4 rs336381    | 143218594 |    | 4 ADDxCUMPD | 484   | -2.92E-05 | -5.337 |
|     | 18 rs11875727 | 6525878   |    | 1 ADDxCUMPD | 484   | -8.49E-06 | -5.291 |
|     | 16 rs3743957  | 19397959  |    | 1 ADDxCUMPD | 482   | -2.70E-05 | -5.287 |
|     | 9 rs10812520  | 27037246  |    | 4 ADDxCUMPD | 484   | -7.06E-06 | -5.286 |
|     | 18 rs770236   | 2518528   |    | 3 ADDxCUMPD | 484   | -6.31E-06 | -5.279 |
|     | 18 rs1367685  | 36645822  |    | 1 ADDxCUMPD | 484   | -5.75E-06 | -5.223 |
|     | 18 rs1896950  | 36652154  |    | 3 ADDxCUMPD | 483   | -5.74E-06 | -5.214 |
|     | 9 rs7873432   | 12241115  |    | 3 ADDxCUMPD | 483   | -1.88E-05 | -5.181 |
|     | 13 rs2117906  | 79709010  |    | 3 ADDxCUMPD | 484   | -1.05E-05 | -5.177 |
|     | 18 rs12608087 | 19650555  |    | 4 ADDxCUMPD | 484   | -1.21E-05 | -5.169 |
|     | 11 rs567199   | 79353368  |    | 4 ADDxCUMPD | 484   | -1.29E-05 | -5.161 |
|     | 9 rs10960540  | 12227630  |    | 2 ADDxCUMPD | 482   | -1.87E-05 | -5.158 |
|     | 8 rs16905252  | 135882875 |    | 3 ADDxCUMPD | 484   | -8.12E-06 | -5.156 |
|     | 11 rs563836   | 79343580  |    | 2 ADDxCUMPD | 483   | -1.29E-05 | -5.153 |
|     | 8 rs7818862   | 78737832  |    | 2 ADDxCUMPD | 484   | -6.10E-06 | -5.138 |
|     | 7 rs1608500   | 39923354  |    | 2 ADDxCUMPD | 484   | -1.37E-05 | -5.116 |
|     | 6 rs9487754   | 112343990 |    | 2 ADDxCUMPD | 484   | -1.79E-05 | -5.11  |
|     | 16 rs12149765 | 46589830  |    | 1 ADDxCUMPD | 484   | -6.97E-06 | -5.076 |
|     | 4 rs1491262   | 13301398  |    | 4 ADDxCUMPD | 484   | -7.63E-06 | -5.07  |
|     | 20 rs11697381 | 39923770  |    | 3 ADDxCUMPD | 484   | -7.85E-06 | -5.026 |
|     | 2 rs11899696  | 229403044 |    | 4 ADDxCUMPD | 484   | -1.45E-05 | -5.002 |
|     | 18 rs17678758 | 36676308  |    | 1 ADDxCUMPD | 484   | 5.68E-06  | 5.001  |
|     | 18 rs10502442 | 19836827  |    | 4 ADDxCUMPD | 483   | -1.18E-05 | -4.999 |
|     | 8 rs2293879   | 17545895  |    | 4 ADDxCUMPD | 484   | -1.32E-05 | -4.996 |
|     | 4 rs4466023   | 153312942 |    | 1 ADDxCUMPD | 484   | -1.22E-05 | -4.991 |
|     | 10 rs1903876  | 67436477  |    | 2 ADDxCUMPD | 484   | -8.15E-06 | -4.988 |
|     | 7 rs17623382  | 140238696 |    | 3 ADDxCUMPD | 484   | -8.36E-06 | -4.983 |
|     | 19 rs3745788  | 51686673  |    | 3 ADDxCUMPD | 484   | -1.11E-05 | -4.959 |
|     | 20 rs6072515  | 39937195  |    | 1 ADDxCUMPD | 484   | -6.59E-06 | -4.953 |
|     | 8 rs7822757   | 78770264  |    | 4 ADDxCUMPD | 482   | -5.91E-06 | -4.945 |
|     | 9 rs1002393   | 2483381   |    | 3 ADDxCUMPD | 484   | -8.21E-06 | -4.941 |
|     | 22 rs7285863  | 29321124  |    | 4 ADDxCUMPD | 484   | -9.14E-06 | -4.936 |
|     | 14 rs12880735 | 26994025  |    | 1 ADDxCUMPD | 483   | -5.99E-06 | -4.934 |
|     | 14 rs6572555  | 48727274  |    | 1 ADDxCUMPD | 484   | -6.12E-06 | -4.928 |
|     | 18 rs9965173  | 7201755   |    | 3 ADDxCUMPD | 484   | -1.09E-05 | -4.927 |
|     | 8 rs1353739   | 89842767  |    | 1 ADDxCUMPD | 484   | -7.66E-06 | -4.924 |

| SNP         | BETA_OS   | P_OS     | GENE     |
|-------------|-----------|----------|----------|
| rs112369237 | 1.67846   | 9.73E-75 | CD38     |
| rs145016072 | 1.38126   | 2.63E-67 | PRKCB1   |
| rs10842534  | -1.73043  | 2.73E-64 | LRMP     |
| rs112082439 | 2.37089   | 5.94E-60 | MYH7     |
| rs35076533  | 3.67106   | 1.57E-58 | INDO     |
| rs71429274  | 1.65205   | 2.44E-57 | DES      |
| rs187915687 | 3.00284   | 5.24E-55 | GBP4     |
| rs75380171  | 1.62739   | 3.56E-54 | MYL4     |
| rs186573288 | 1.16401   | 4.93E-54 | HRC      |
| rs201295780 | 0.813203  | 6.87E-53 | UNQ5783  |
| rs4149586   | 1.2784    | 5.82E-51 | TNFRSF7  |
| rs143643371 | 3.00608   | 5.43E-50 | TNFRSF17 |
| rs139506863 | 1.1875    | 1.75E-48 | LAMP3    |
| rs61828164  | 2.64194   | 2.28E-48 | AIM2     |
| rs142357617 | 0.798711  | 2.40E-48 | CR2      |
| rs71446273  | 0.960642  | 9.11E-48 | FZD10    |
| rs139094755 | 2.07021   | 6.60E-47 | POU2AF1  |
| rs11668714  | 1.09343   | 3.36E-46 | HSH2D    |
| rs72827441  | 1.27075   | 1.69E-45 | IRF4     |
| rs79286514  | 0.629891  | 3.56E-45 | ZNF556   |
| rs185822388 | 2.25339   | 1.26E-44 | CD79A    |
| rs111928500 | 0.95902   | 1.48E-44 | CD79B    |
| rs117563269 | 1.08162   | 1.65E-44 | NCF1     |
| rs201085497 | 0.790086  | 3.58E-44 | AICDA    |
| rs113604966 | 0.953991  | 4.29E-44 | CACNG1   |
| rs145670948 | 1.02995   | 4.68E-44 | BLK      |
| rs145495456 | 1.64687   | 5.54E-44 | DHRS9    |
| rs192431720 | 1.70851   | 1.18E-43 | RSAD2    |
| rs143202096 | 1.2059    | 1.36E-43 | OASL     |
| rs142950254 | 2.14217   | 1.47E-43 | TNFSF7   |
| rs33961580  | 2.54956   | 5.03E-43 | SOX8     |
| rs117551866 | 0.978061  | 7.10E-43 | FCER2    |
| rs111554017 | -0.773563 | 1.64E-42 | BCAS1    |
| rs117644736 | 1.52226   | 3.07E-42 | CKM      |
| rs200421298 | 0.747791  | 3.07E-42 | CYP2J2   |
| rs141504323 | 1.49286   | 3.47E-42 | TRIM55   |
| rs117690530 | 2.00833   | 5.93E-42 | OAS1     |
| rs184707147 | 0.522112  | 1.75E-41 | TCL1A    |
| rs138349633 | 1.18714   | 6.30E-41 | CLDN5    |
| rs1762681   | 1.49729   | 8.50E-41 | PRDM1    |
| rs78758407  | 0.84547   | 1.27E-40 | PTPRCAP  |
| rs117461227 | 0.73743   | 1.43E-40 | CBFA2T3  |
| rs184821125 | 0.93691   | 5.50E-40 | EEF1A2   |
| rs199562883 | -0.361184 | 6.69E-40 | PTP4A3   |
| rs189026316 | 0.784541  | 6.73E-40 | COX6A2   |
| rs4607407   | 0.528147  | 9.51E-40 | CCR6     |
